# 1 **FGF signaling dynamics regulates epithelial patterning and morphogenesis**

2 Jakub Sumbal<sup>1</sup>, Tereza Vranova<sup>1</sup>, Zuzana Koledova<sup>1\*</sup>

3 <sup>1</sup>Department of Histology and Embryology, Faculty of Medicine, Masaryk University, Brno 625 00,  
4 Czech Republic

5 \*To whom correspondence should be addressed:

6 Dr. Zuzana Koledova

7 Faculty of Medicine, Masaryk University, Department of Histology and Embryology, Kamenice 3, 625  
8 00 Brno, Czech Republic

9 [koledova@med.muni.cz](mailto:koledova@med.muni.cz)

10 ORCID IDs:

11 JS: 0000-0003-3700-4518;

12 ZK: 0000-0002-9333-1399.

13 **Key words:** branching morphogenesis, fibroblast growth factor, mammary gland, organoid, signaling  
14 dynamics

15 **Running title:** FGF dynamics regulates epithelial morphogenesis

## 16 **Summary**

17 Single cell assays revealed that growth factor signaling dynamics is actively sensed by a cell and  
18 ultimately controls cell fate. However, the effects of growth factor signaling dynamics at the tissue  
19 level have been unknown. We used mammary epithelial organoids, time-lapse imaging, fibroblast  
20 growth factor 2 (FGF2) variants of different stabilities, mathematical modeling, and perturbation  
21 analysis to study the role of FGF2 signaling dynamics in epithelial morphogenesis. We found that  
22 fluctuant and sustained FGF signaling dynamics induced distinct morphological and functional states  
23 of mammary epithelium through differential employment of intracellular effectors ERK and AKT. ERK  
24 activity domains determined epithelial branch size, while AKT activity drove epithelial stratification.  
25 Furthermore, FGF signaling dynamics affected epithelial tissue mechanoresponsiveness to  
26 extracellular matrix, thereby impinging upon branch elongation. Our study provides new insights into  
27 regulation of epithelial patterning and branching morphogenesis by FGF signaling dynamics and into  
28 downstream signaling effectors that regulate cellular outcomes.

## 29 Introduction

30 Orchestration of complex cell behaviors, such as proliferation, migration, differentiation, and death on  
31 population level is essential for building functional tissues during morphogenesis. It is achieved  
32 through cell-to-cell communication using core signaling pathways, including receptor tyrosine kinase  
33 (RTK) signaling, transforming growth factor signaling, WNT, NOTCH and Hedgehog signaling. Spatial  
34 and temporal distribution of various ligands and receptors forms the basic molecular infrastructure for  
35 signaling. However, it has long been elusive how activation of a specific receptor translates into a  
36 ligand-specific response using just a handful of downstream signaling modules that are common for all  
37 receptors within particular signaling pathway family, such as ERK, AKT, STAT and PLC $\gamma$  in RTK signaling  
38 pathways, and how these signaling modules are employed and coordinated in multicellular tissues  
39 during formation of complex tissue shapes.

40 Seminal studies in PC12 cell line revealed that on cellular level, different growth factors acting  
41 through different RTKs encode different cellular outcomes by inducing distinct temporal patterns of  
42 ERK activity - transient or sustained (Gotoh et al., 1990; Nguyen et al., 1993; Santos et al., 2007).  
43 Further works elaborated these observations and found that ERK activity dynamics, defined by  
44 duration, magnitude, time-course and spatial localization of ERK activity (Muta et al., 2019), acts as a  
45 signaling code that defines cell fates (Blum et al., 2019; Ryu et al., 2015). The patterns of ERK activity  
46 dynamics are interpreted into cellular outcomes using hierarchical control of gene expression by ERK-  
47 regulated transcription factors (Gille et al., 1995; Murphy et al., 2002; Nakakuki et al., 2010). Moreover,  
48 the variety of cellular outcomes in response to different growth factors is further increased by  
49 differential employment of other downstream signaling pathways, such as AKT, which modulate  
50 activity of the effector molecules (Sampattavanich et al., 2018). Current evidence suggests that the  
51 sum effect of ligand identity, concentration, temporal dynamics, and combinations with other ligands  
52 is sensed, processed and interpreted in a cell-type and context dependent manner (Li and Elowitz,  
53 2019). However, it remains poorly understood how these signaling variables are interpreted and how  
54 these cellular outcomes are coordinated on a tissue level during morphogenesis.

55 Fibroblast growth factor (FGF) signaling is a crucial pathway that regulates vertebrate  
56 development from the earliest embryonic stages throughout lifetime. Regulating cell proliferation,  
57 survival, differentiation and migration, it controls a wide range of biological functions (Turner and  
58 Grose, 2010). Importantly, FGF signaling has a conserved role in regulation of branching  
59 morphogenesis from *Drosophila* to vertebrates, governing development of branched organs such as  
60 fly trachea or mammalian lung, kidney, and mammary glands (Lu and Werb, 2008). In mammals,  
61 canonical FGF signaling pathway comprises of 15 extracellularly secreted FGFs, which bind to seven  
62 isoforms of FGF receptors (FGFRs). Binding of FGF ligand to FGFR results in receptor dimerization,  
63 phosphorylation and activation of downstream signalling pathways, including ERK, AKT, PLC $\gamma$  and  
64 STAT3 signaling pathways (Turner and Grose, 2010).

65 Changes in FGF ligand expression, retention, and diffusion, including formation of gradients,  
66 and fluctuations in FGF signaling are inherent to mammalian development (Balasubramanian and  
67 Zhang, 2016; Makarenkova et al., 2009; Niwa et al., 2007; Ornitz and Itoh, 2015; Wahl et al., 2007).  
68 However, it remains incompletely understood how FGF signaling dynamics regulates morphogenesis.  
69 Therefore, in this work, we used a well-established experimental model of FGF2-induced branching  
70 morphogenesis of primary mammary epithelial organoids (Ewald et al., 2008) to study the role of FGF  
71 signaling dynamics in epithelial morphogenesis. To induce various FGF ligand dynamics, we used two  
72 variants of FGF2, the wild-type FGF2 (FGF2-wt) and its hyperstable mutant (FGF2-STAB) created by  
73 protein engineering (Dvorak et al., 2018). While FGF2-wt is naturally unstable and undergoes fast  
74 thermal unfolding and deactivation (half-life approximately 6 h at 37°C), FGF2-STAB exhibits high

75 thermal stability and activity over 30 days at 37°C (Dvorak et al., 2018; Koledova et al., 2019). We  
76 applied these ligands in a range of concentrations and medium changing strategies, which created a  
77 variety of FGF ligand availability schemes according to mathematical modelling. Using these  
78 methodological approaches, we provide new insights into regulation of epithelial patterning and  
79 branching morphogenesis by FGF signaling dynamics and the specific roles of downstream signaling  
80 components in regulation of distinct morphological outcomes.

## 81 **Results**

### 82 **FGF signaling dynamics governs epithelial morphogenesis**

83 To assess the role of FGF signaling dynamics in epithelial morphogenesis, we treated mammary  
84 organoids with 1 nM FGF2-wt, which we delivered in a range of different medium changing strategies  
85 over 9 days of culture ([Supplemental Figure 1A](#)). The most commonly used strategy in cell culture, with  
86 the medium change every three days (C3d), induced formation of thin branches (i.e. normal branching  
87 of organoids) as expected ([Figure 1A, B](#)). When the fresh FGF2-wt was added only once at the beginning  
88 of culture and was left for the duration of culture with no change (NC) of the medium, or was added  
89 only for one- or three-hour pulse (p1h, p3h), no branching was observed, and organoids only mildly  
90 grew and formed cysts ([Figure 1A](#)). Increasing frequency of medium change to every day (Ced) or every  
91 6 hours (C6h) increased the percentage of branching organoids ([Figure 1A, B](#)) and the phenotype of  
92 branching was the same as when the medium was changed every three days. But when we added fresh  
93 FGF2-wt every 6 hours (A6h), which is the half-life of FGF2-wt, a new epithelial phenotype emerged,  
94 characterized by thick branches, that we named massive branching ([Figure 1A, B](#)). Mathematical  
95 modeling of FGF2 concentration in the medium revealed that the condition of adding 1 nM FGF2 every  
96 6 hours was the only condition when the concentration of FGF2-wt in the medium did not drop much  
97 below 1 nM during the whole organoid culture period ([Figure 1C](#)). This suggested that sustained  
98 signaling of 1 nM FGF2 is critical for formation of massive branches.

99 To test this finding, we employed a stabilized form of FGF2 with long-term thermostability,  
100 FGF2-STAB (Dvorak et al., 2018). Unlike FGF2-wt, FGF2-STAB remains active after preincubation at 37°C  
101 for 7 days and effectively induces branching in the mammary organoids system ([Supplemental Figure](#)  
102 [2A, B](#)). We applied the same medium-changing or FGF2-adding strategies with FGF2-STAB as we had  
103 done with FGF2-wt. In all these conditions, FGF2-STAB effectively induced epithelial branching, and in  
104 most of the conditions FGF2-STAB induced the massive branching phenotype ([Figure 1A-C](#)). Only when  
105 the FGF2-STAB was applied in a one- or three-hour pulse, the organoids developed thin branches  
106 ([Figure 1A, B](#)). Importantly, these were the only two conditions in which the FGF2 concentration  
107 dropped significantly below 1 nM over the organoid culture period ([Figure 1C](#)).

### 108 **Mathematic modeling reveals a critical dose of FGF signaling for induction of massive branches**

109 To express mathematically the amount of FGF signaling achieved by FGF2 supplied at a known  
110 concentration by different medium-changing or FGF2-adding strategies over the organoid culture  
111 period, we calculated a „cumulative dose“ for each condition. The cumulative dose corresponds to the  
112 area under the curve of the plot modeling FGF2 dynamics over time (see [Methods](#)). These calculations  
113 revealed that for FGF2-wt the cumulative dose of FGF signaling increased with increasing frequency of  
114 medium change or FGF2 addition. In the case of FGF2-STAB, the cumulative dose of FGF signaling was  
115 relatively stable from the no medium change to the medium change every 6 hours strategy ([Figure](#)  
116 [1D](#)). Adding FGF2-STAB every 6 hours led to a major increase of the cumulative dose but it had no  
117 further effect on the epithelial phenotype, suggesting that the system was already saturated.  
118 Importantly, these calculations further showed that only the condition of adding FGF2-wt every 6

119 hours, which was the only one inducing massive branching with FGF2-wt, reached the cumulative dose  
120 of FGF signaling similar to the dose achieved by FGF2-STAB at conditions when it induced massive  
121 branching (Figure 1D).

122 Furthermore, we exposed the organoids to a wide range of FGF2-wt or FGF2-STAB  
123 concentrations under the strategy of medium change every three days. With the increasing  
124 concentration of FGF2 the percentage of branching organoids increased for both FGF2-wt and FGF2-  
125 STAB, and FGF2-STAB showed a ten times higher total branching inducing potency than FGF2-wt  
126 (Figure 1E). FGF2-STAB very effectively induced massive branching of organoids from 1 nM  
127 concentration. FGF2-wt induced massive branching only at 20 nM or higher concentrations, yet still  
128 only in a low percentage of organoids. The efficiency of induction of massive branching correlated with  
129 the cumulative dose of FGF signaling (Figure 1F).

130 Taken together, we found that not only the FGF2 concentration per se, but the temporal  
131 dynamics of FGF2 signaling regulates distinct morphogenetic outcomes in the mammary epithelium.  
132 When 1 nM FGF2 is supplied, fluctuant FGF signaling induces normal branching, while sustained FGF  
133 signaling induces massive branching, as a result of the cumulative dose of FGF acquired over time.

### 134 **FGF signaling dynamics regulates multiple epithelial cell functions that contribute to the** 135 **morphogenetic outcome**

136 Next, we sought to characterize the new massive branching phenotype, induced by sustained FGF  
137 signaling. To this end, we cultured organoids with 1 nM FGF2-wt or FGF2-STAB with medium changed  
138 every three days. By careful analysis of time-lapse movies of growing organoids, we found that in  
139 massively branching organoids, the branching occurs later than in normally branching organoids and  
140 is preceded by an enormous growth of the epithelium (Figure 2A, B; Supplemental Figure 3A,  
141 Supplemental Videos 1-3). Histological analysis of the organoids showed that the massive branches  
142 induced by sustained FGF signaling were formed by prominently stratified epithelium (Figure 2C;  
143 Supplemental Figure 3B). Moreover, the normally and massively branched organoids differed in  
144 epithelial cell type distribution. The normal branches of organoids exposed to fluctuant FGF signaling  
145 lacked myoepithelial cells at the tips of the branches, a phenomenon previously reported for mammary  
146 organoids cultured in Matrigel (Nguyen-Ngoc and Ewald, 2013). However, the massive branches of  
147 FGF2-STAB-treated organoids were fully covered by myoepithelial cells (Figure 2C, D; Supplemental  
148 Figure 4A, B).

149 Besides altering the shape of organoids, sustained FGF signaling also promoted formation of  
150 bigger organoids (Figure 2E). Because in the bright field images the real difference in organoid growth  
151 could be masked by lumen enlargement, we also counted the total number of nuclei and the number  
152 of BrdU+ nuclei per organoid section to measure organoid proliferation, and we assessed apoptosis  
153 using staining for cleaved caspase 3. We found significantly increased number of total nuclei as well as  
154 BrdU+ nuclei in FGF2-STAB organoids in comparison to FGF2-wt organoids (Figure 2E, F; Supplemental  
155 Figure 5A) and decreased apoptosis in FGF2-STAB organoids (Supplemental Figure 5B, C). The most  
156 significant difference in BrdU+ nuclei numbers was found on days 3 and 4, which is when the concentric  
157 growth of FGF2-STAB-treated organoids is observed. On day 3 we detected an increased proportion of  
158 myoepithelial cells among proliferating cells in FGF2-STAB-treated organoids (Figure 2G; Supplemental  
159 Figure 6A), which helps to explain the supply of cells for the full myoepithelial coverage of massively  
160 branched organoids (Figure 2C, D).

161 To assess the effect of different FGF signaling dynamics on cell renewal capacity, we  
162 dissociated organoids exposed to either no, fluctuant, or sustained FGF signaling to single cells, which  
163 we further tested in mammosphere formation assay (Supplemental Figure 7A) or organoid formation

164 assay (Supplemental Figure 7B). Cells derived from FGF2-STAB-treated organoids formed significantly  
165 more mammospheres in the third generation (Figure 2H), indicating a higher content of stem cells in  
166 FGF2-STAB-treated organoids. In the long-term organoid formation experiment, FGF2-STAB induced  
167 formation of bigger and branched organoids, while organoids formed with FGF2-wt were smaller and  
168 cystic (Supplemental Figure 7B-D). This suggests that sustained FGF signaling is essential to retain  
169 morphogenetic capacity of epithelial cells. Organoids subjected to sustained FGF signaling also showed  
170 reduced epithelial polarity, as shown by  $\beta$ -catenin and E-cadherin staining and by ultrastructural  
171 analysis of cell-cell connections (Supplemental Figure 8A-C). Additionally, ultrastructural analysis  
172 revealed enlarged mitochondria and dilated endoplasmic reticulum in FGF2-STAB treated organoids  
173 (Figure 2I; Supplemental Figure 8D), indicating increased metabolic activity of cells subjected to  
174 sustained FGF signaling.

175 Together our data show that FGF signaling dynamics regulates a plethora of cell functions,  
176 which on tissue level result in different morphogenic outcomes. In comparison to fluctuant FGF  
177 signaling, sustained FGF signaling promotes more cell proliferation, including in myoepithelial cells,  
178 which contributes to full myoepithelial coverage of massive branches, reduced apoptosis, higher  
179 metabolism and increased epithelial cell regenerative and morphogenetic potential. However, while  
180 these functions regulate cell number and tissue size, they do not explain how different tissue shapes  
181 arise upon different FGF signaling dynamics. We hypothesized a role of downstream signaling  
182 pathways, including ERK and AKT, in regulation of tissue architecture.

### 183 **FGF signaling dynamics regulates epithelial branching via ERK signaling**

184 Organoid branching and branch elongation were demonstrated to be regulated by ERK signaling in  
185 response to FGF signaling (Huebner et al., 2016). We hypothesized that ERK signaling regulates branch  
186 thickness depending on FGF signaling dynamics. Therefore, we analyzed the effect of ERK signaling  
187 inhibition by U0126 on organoid branching morphogenesis upon fluctuant and sustained FGF signaling.  
188 U0126 abrogated branching of organoids treated either with FGF2-wt or FGF2-STAB (Figure 3A, B).  
189 Interestingly, epithelial stratification and full myoepithelial coverage in response to sustained FGF  
190 signaling was not affected by U0126 (Figure 3C; Supplemental Figure 9A). A higher concentration of  
191 U0126 was needed to inhibit branching in FGF2-STAB-treated organoids in comparison to FGF2-wt-  
192 treated organoids, suggesting higher ERK signaling activity in FGF2-STAB-treated organoids. This was  
193 further corroborated by Western blot detection of higher amount of active ERK (phosphorylated ERK,  
194 pERK) (Figure 3D) and higher expression of FGF-ERK signaling genes (*Dusp6*, *Etv4* and *Etv5*) by qPCR in  
195 FGF2-STAB organoids (Figure 3E).

196 Analysis of spatial distribution of pERK in the organoids revealed that in response to sustained  
197 as well as fluctuant FGF signaling, pERK is mosaically distributed early during the morphogenesis in  
198 round organoids, but forms distinct domains in the tips of the branches, while the necks of the  
199 branches are poor in pERK (Figure 3F). In the branches, pERK positive cells are localized mainly in layers  
200 of luminal cells (Figure 3G). Importantly, the domains of pERK were bigger in response to sustained  
201 FGF signaling, suggesting that the size of pERK domains determines the thickness of the branches  
202 (Figure 3F).

### 203 **AKT signaling is crucial for epithelial stratification**

204 Besides the ERK pathway, several other signaling pathways act downstream of FGFR, including AKT,  
205 STAT and PLC $\gamma$  pathways. To assess their contribution to the morphogenetic response upon different  
206 dynamics of FGF signaling, we used inhibitors of AKT (Akti1/2), STAT3 (Stattic), or PLC $\gamma$  (U73122). But  
207 first as a control that the effects of both FGF2-wt and FGF2-STAB were mediated through FGFR, we  
208 used BGJ398, an FGFR inhibitor. BGJ398 effectively inhibited organoid growth and branching

209 morphogenesis in both FGF2-wt- and FGF2-STAB-treated organoids. A higher concentration of BGI398  
210 was needed to significantly abrogate branching induced by FGF2-STAB than by FGF2-wt, suggesting a  
211 higher level of FGFR signaling induced by FGF2-STAB (Supplemental Figure 10A-C). Inhibition of either  
212 STAT3 or PLC $\gamma$  somewhat decreased normal branching by FGF2-wt and massive branching by FGF2-  
213 STAB, but without reaching statistical significance (Supplemental Figure 10A-C). However, inhibition of  
214 AKT led to a significant decrease in both FGF2-wt- and FGF2-STAB-induced branching (Figure 4A, B)  
215 and, importantly, caused a dramatic loss of massive growth and epithelial stratification induced by  
216 sustained FGF signaling (Figure 4A-C). Additionally, we detected elevated amount of phosphorylated  
217 AKT (pAKT, activated) in FGF2-STAB-treated organoids (Figure 4D), suggesting that sustained FGF  
218 signaling leads to hyperactivation of this pathway.

219 Based on our data from time-lapse imaging (Figure 2A, B) we hypothesized that the concentric  
220 massive growth of organoids around day 3 is crucial for subsequent massive branching because the  
221 biggest differences in new branch development and proliferation occurs at that time. Therefore, to  
222 assess whether at that time the AKT signaling is important for the massive growth, we treated  
223 organoids under sustained FGF signaling with Akti1/2 from either day 0, 3, or 6. When Akti1/2 was  
224 added on day 6, massive branching occurred, similarly to organoids with no inhibitor (Figure 4E, G).  
225 When Akti1/2 was added on day 3, the growth of the organoid was severely reduced, similarly to  
226 Akti1/2 addition from day 0 (Figure 4E, F). Importantly, although the growth and stratification of the  
227 organoid did not occur, development of new branches was not affected (Figure 4E, G). This suggested  
228 that AKT signaling is essential for epithelial stratification.

229 The basal organoid medium, in which the organoids are cultured and exposed to FGF signaling,  
230 contains a potent inducer of AKT signaling, insulin. To assess how this additional insulin-induced AKT  
231 signaling contributes to organoid morphogenesis, we cultured the organoids under FGF signaling  
232 without the insulin-containing component of the basal organoid medium (supplement ITS) or in the  
233 presence of insulin receptor inhibitor (BMS 536924). Loss of insulin signaling led to a similar phenotype  
234 as the AKT inhibition; total organoid branching was not affected, but the massive growth and epithelial  
235 stratification of FGF2-STAB treated organoids were lost completely (Supplemental Figure 11 A-C).

236 At last we inhibited both AKT and ERK signaling at the same time by combination of Akti1/2  
237 and U0126. This combined inhibition completely abrogated any morphogenesis (Supplemental Figure  
238 12A), similarly to FGFR inhibition (Supplemental Figure 10A-C), suggesting that ERK and AKT pathways  
239 are the major pathways orchestrating epithelial morphogenesis downstream of FGF.

## 240 **Massive branches induced by sustained FGF2 signaling in ex vivo organoids phenocopy terminal end** 241 **buds in vivo**

242 During mammary gland development, soluble signals are integrated with mechanical signals to guide  
243 morphogenesis (Gjorevski and Nelson, 2011). Therefore, we investigated the effect of different FGF2  
244 signaling dynamics on mammary epithelial morphogenesis in extracellular matrix (ECM) of increased  
245 stiffness and fibrillarity – a mixture of Matrigel with collagen I – which is by composition and physical  
246 properties closer to ECM in vivo (Nguyen-Ngoc and Ewald, 2013). Concordantly to previous reports  
247 (Neumann et al., 2018; Nguyen-Ngoc and Ewald, 2013), we found that in the mixture of Matrigel with  
248 collagen, organoids formed significantly longer branches when exposed to fluctuant FGF2 signaling.  
249 However, when exposed to sustained FGF2 signaling, the organoid branches did not elongate (Figure  
250 5A, B; Supplemental Videos 4 and 5). This suggested uncoupling of FGF2-STAB-treated organoids from  
251 mechanical signals of the ECM. To test if the epithelial cells exert mechanical forces on the surrounding  
252 ECM, we cultured the organoids in fluorescently labelled collagen. When cells pull on the collagen  
253 fibers, the fibers are aligned closer together, increasing fluorescent signal intensity. Aligned collagen

254 was visible around branch necks of the FGF2-wt-treated organoids, but not around the massively  
255 branched FGF2-STAB-treated organoids (Figure 5C), demonstrating lack of mechanotransduction  
256 between the FGF2-STAB-treated organoid and the surrounding ECM.

257 Furthermore, by histological examination we noticed that by their bulb shape and extensive  
258 stratification, the massive branches of FGF2-STAB-treated organoids morphologically resembled  
259 terminal end buds (TEBs) of mammary gland in vivo (Figure 5D), the structures that drive mammary  
260 epithelial branching morphogenesis during puberty (Paine and Lewis, 2017). FGF2-wt-treated  
261 organoids contained branches formed mostly from a bi-layered epithelium and only some tips of the  
262 branches contained more than two layers of cells. Thereby, they resembled side branches in the  
263 mammary gland in vivo (Figure 5D). Immunohistological analysis of epithelial cell markers further  
264 accentuated the similarities between the normal and massive branches ex vivo and side branches and  
265 TEBs in vivo, respectively (Figure 5D). Moreover, the myoepithelial cells in massive branches of FGF2-  
266 STAB-treated organoids displayed a cuboidal shape similar to cap cells of TEBs, while the myoepithelial  
267 cells in the FGF2-wt-treated organoids and in the mammary ducts/side branches in vivo were flatter,  
268 based on their height to width ratio on organoid and tissue sections (Figure 5E, F). Collectively, the  
269 histology, lack of massive branch elongation in collagenous ECM, and increased regenerative potential  
270 of FGF2-STAB-treated organoids (Figure 2H; Supplemental Figure 7A-D) suggest that the massive  
271 branches of FGF2-STAB-treated organoids are ex vivo counterparts TEBs in vivo. Thus, our findings  
272 propose that distinct signaling dynamics encode different morphogenetic outcomes of physiological  
273 relevance (Figure 5G).

## 274 Discussion

275 In this study, we investigated the role of FGF signaling dynamics in epithelial morphogenesis using the  
276 model of mammary epithelial organoids. FGF signaling is a well-established regulator of mammary  
277 gland branching morphogenesis (Ewald et al., 2008; Lu et al., 2008; Parsa et al., 2008; Pond et al., 2013;  
278 Sumbal and Koledova, 2019; Zhang et al., 2014). In vivo studies using genetic mouse models revealed  
279 roles of particular FGFRs in mammary gland morphogenesis (Lu et al., 2008; Parsa et al., 2008). Ex vivo  
280 3D cultures of mammary epithelial organoids have elucidated the effects of individual FGF ligands on  
281 mammary epithelium (Ewald et al., 2008; Fata et al., 2007; Simian et al., 2001; Zhang et al., 2014).  
282 Thus, the role of FGF signaling in mammary epithelial morphogenesis has been well defined on the  
283 qualitative level; however, the quantitative aspects of FGF signaling, including the role of FGF signaling  
284 dynamics, have not been studied.

285 Using two variants of FGF2 with very different protein stabilities, and different medium  
286 changing strategies we exposed organoids to various dynamics of FGF2 availability. We discovered that  
287 fluctuant FGF2 signaling induces formation of thin branches, and that sustained FGF2 signaling leads  
288 to formation of massive, wide branches. In comparison to fluctuant FGF2 signaling, sustained FGF2  
289 signaling led to increased activity of all FGFR downstream signaling pathways. In particular, ERK activity  
290 was increased and prolonged in FGF2-STAB-treated organoids in comparison to FGF2-wt-treated  
291 organoids. ERK activity dynamics has been suggested to play a key role in regulating mammary  
292 epithelial branching morphogenesis in response to different growth factors. In mammary organoid  
293 culture, TGF $\alpha$  induced sustained ERK activation and epithelial branching, and FGF7 induced only  
294 transient ERK activation and epithelial growth (Fata et al., 2007). Our study corroborates and extends  
295 these findings by demonstrating that different ERK activity dynamics, induced downstream of the same  
296 receptor, regulate mammary epithelial patterning and morphogenesis. Our study is, however, limited  
297 by endpoint-type analytical approaches to ERK activity quantification (immunodetection on fixed  
298 samples or Western blot and qPCR analysis at defined timepoints). Future studies using ERK activity

299 biosensors (de la Cova et al., 2017; Komatsu et al., 2011) would be very helpful to elucidate ERK  
300 signaling dynamics during mammary epithelial morphogenesis in a much greater detail. Such studies  
301 could also help to define the role of ERK signaling domains in epithelial branch patterning and  
302 elongation. We found that domains of active ERK were larger in FGF2-STAB-treated organoids than in  
303 FGF2-wt-treated organoids and coincided with branch formation sites, suggesting that the size of ERK  
304 activity domains determines the diameter of nascent branches. Our experimental data are in  
305 agreement with computational simulations of multicellular morphogenesis using reaction-diffusion  
306 patterning, in which activator concentration and patterning determine morphological outcome of  
307 branching (Okuda et al., 2018). It remains to be determined, how ERK signaling domains become  
308 specified within the mammary epithelium.

309 Previous reports suggested that spatial enrichment of active ERK at the tips of the branches  
310 drives branch elongation (Huebner et al., 2016). In our model, active ERK was spatially enriched in cells  
311 in distal tips of the branches during both normal and massive branching. However, the branches  
312 efficiently elongated only in the FGF2-wt-treated organoids. The phenotype was even more prominent  
313 in ECM composed of Matrigel with collagen I that was previously demonstrated to promote formation  
314 of significantly longer branches than pure Matrigel (Nguyen-Ngoc and Ewald, 2013). This suggests that  
315 under sustained FGF2 signaling, epithelial stratification is dominant over epithelial cell intercalation  
316 into basal surface, the mechanism required for epithelial tube elongation (Neumann et al., 2018). This  
317 is probably due to changes in mechanosignaling in myoepithelial cells and/or changes in their  
318 mechanical properties, as suggested by changes in myoepithelial cell geometry and lack of force-  
319 mediated collagen I assembly under sustained FGF2 signaling.

320 ERK dynamics alone does not predict the cellular outcome. Rather, cell fate depends on a  
321 combination of downstream signaling activities induced by particular growth factor dynamics (Chen et  
322 al., 2012; Sampattavanich et al., 2018). On tissue level we detected contribution of AKT-mediated cell  
323 activities to epithelial branching, and we identified AKT signaling as a crucial regulator of epithelial  
324 stratification and massive branching phenotype. Furthermore, we pinpointed the important role of  
325 “basal” AKT signaling, provided by insulin present in the basal medium during ex vivo culture. This is  
326 consistent with essential role of insulin-like growth factor 1 in ductal morphogenesis and formation of  
327 TEBs (Ruan and Kleinberg, 1999), the naturally occurring stratified mammary epithelial structures that  
328 drive mammary branching morphogenesis during puberty. Furthermore, our data demonstrate that  
329 inputs from several RTKs are integrated on downstream signaling nodes to regulate tissue  
330 morphogenesis in concert.

331 Importantly, our work brings novel insights how intracellular signaling activities of ERK and AKT  
332 combinatory regulate distinct morphological and functional states of mammary epithelium. Increased  
333 and prolonged ERK and AKT signaling promotes formation of TEB-like structures, while moderate and  
334 transient ERK and AKT signaling induces formation of thin branches. In our model these distinct  
335 downstream signaling activities and morphogenetic outcomes were induced by different FGF2  
336 signaling dynamics and are in concordance with the essential roles of FGF signaling in TEB formation  
337 during puberty and in side branching and alveologenesis during pregnancy (Lu et al., 2008; Parsa et al.,  
338 2008). The potential mechanisms for regulation of FGF signaling dynamics in vivo include differential  
339 production, retention and distribution of FGF ligands in the mammary stroma, differential expression  
340 of FGFR isoforms, or differential use of downstream feedback loops (Soady et al., 2017). Furthermore,  
341 in vivo the distinct ERK and AKT signaling activities most likely result from combinatorial effects of  
342 several growth factors and other signals, such as matrix metalloproteinases, present in the mammary  
343 stroma during postnatal mammary gland development, which collectively regulate mammary gland  
344 morphogenesis (Gjorevski and Nelson, 2011; Mori et al., 2013).



345 Our study also revealed that the distinct morphological states of mammary epithelium  
346 differentially engage ECM to further support epithelial morphogenesis. The non-stratified, side branch-  
347 like epithelial structures exert mechanical forces on surrounding collagen, which promotes branch  
348 elongation. However, the highly stratified TEB-like epithelial structures do not engage collagen in the  
349 surrounding matrix. These findings are in agreement with substantial collagen organization around  
350 mammary ducts and necks of TEBs, and lack of organized collagen around TEBs in vivo (Brownfield et  
351 al., 2013; Hinck and Silberstein, 2005; Lilla and Werb, 2010).

352 Nevertheless, we acknowledge that by their high proliferation, decreased apoptosis, increased  
353 stem cell properties, and multi-layered architecture with intact myoepithelial cell layer, the massively  
354 branched epithelial structures induced by sustained FGF2 signaling resemble not only TEBs, but also  
355 early, non-invasive stages of breast tumors, including hyperplasia, and their in vitro models induced by  
356 oncogenic RTK-Ras signaling (Muthuswamy et al., 2001; Welm et al., 2002). This testifies to the  
357 common critical cellular and signaling mechanisms used in both morphogenesis and cancerogenesis.

358 Precise regulation of complex cell behaviors on population level is essential for building  
359 functional tissues and organs. It is achieved by cell communication codes that we are only beginning  
360 to unravel. Understanding of the signaling codes in development is required for our understanding of  
361 aberrant signaling in developmental defects and disease, including cancer, and development of  
362 effective therapies. Moreover, it is an essential prerequisite for tissue engineering, stem cell therapy  
363 and regenerative medicine. Our study brings insights on how FGF signal availability regulates epithelial  
364 branched pattern formation. Future studies using multi-dimensional measurements of intracellular  
365 signaling activities on tissue scale with single-cell resolution shall help decipher the cell communication  
366 codes, including the relationship between signal processing and cell fate decision-making, during organ  
367 development and morphogenesis.

## 368 **Methods**

### 369 **Mice**

370 Nulliparous ICR females, 6-8 weeks old were used in this study. The animals were obtained from the  
371 Laboratory Animal Breeding and Experimental Facility of the Faculty of Medicine, Masaryk University.  
372 Experiments involving animals were approved in accordance with the Ministry of Agriculture of the  
373 Czech Republic, and the Expert Committee for Laboratory Animal Welfare at the Faculty of Medicine,  
374 Masaryk University.

### 375 **Organoid isolation and culture**

376 Organoid isolation was performed as previously described (Koledova and Lu, 2017). Briefly, the mice  
377 were euthanized by cervical dislocation, the mammary glands were removed, mechanically  
378 disintegrated and partially digested in a solution of collagenase and trypsin [2 mg/ml collagenase  
379 (Sigma), 2 mg/ml trypsin (Thermo Fisher Scientific), 5 µg/ml insulin (Sigma), 50 µg/ml gentamicin  
380 (Sigma), 5% fetal bovine serum (FBS; Hyclone) in DMEM/F12 (Thermo Fisher Scientific)] for 30 min at  
381 37°C with shaking at 100 rpm. Resulting tissue suspension was treated with 20 U/ml DNase I (Sigma)  
382 and exposed to five rounds of differential centrifugation at 450 × g for 10 s, which resulted in  
383 separation of epithelial (organoid) and stromal fractions. The organoids were resuspended in basal  
384 organoid medium [BOM; 1× ITS, 100 U/ml of penicillin, and 100 µg/ml of streptomycin in DMEM/F12  
385 (all from Thermo Fisher Scientific)] and counted.

386 Subsequently, the organoids were mixed with ECM, either pure Matrigel or a mixture of  
387 Matrigel with collagen I. The mixture of Matrigel with collagen I was prepared as previously published  
388 (Koledova, 2017). Briefly, pre-assembled neutralized collagen I was prepared by combing 12.5 volumes

389 of collagen type I (Corning) with 1 volume of 0.22 M NaOH, 5× collagen reconstitution buffer (5× MEM,  
390 20 µg/ml NaHCO<sub>3</sub>, 0.1 M HEPES), and DMEM/F12 to the final concentration 2.58 mg/ml collagen and  
391 incubation of the neutralized collagen I for 1.5 h on ice. Then pre-assembled collagen was mixed with  
392 Matrigel at the ratio 7:3 and this mixture was immediately used to plate organoids. Fluorescently  
393 labelled collagen I was prepared according to a published protocol (Geraldo et al., 2013) using TAMRA  
394 (Sigma).

395 The organoids in ECM were plated in 50 µl domes at following densities: 250-300 organoids  
396 per dome for time-lapse and whole mount immunofluorescent analysis, 300-500 organoids per dome  
397 for histological and transcriptional analysis, 500-1,000 organoids per dome for Western blot analysis.  
398 After setting the ECM for 45-60 min at 37°C, the cultures were overlaid with BOM supplied with no  
399 FGF, or with FGF2-wt or FGF2-STAB (Enantis) according to the experiment. Unless stated otherwise,  
400 concentration of FGF2 was 1 nM. The cultures were incubated in a humidified atmosphere of 5% CO<sub>2</sub>  
401 at 37°C on Olympus IX81 microscope equipped with Hamamatsu camera and CellR system for time-  
402 lapse imaging. The organoids were photographed every 60 min for 9 days with manual refocusing every  
403 day. For analysis of cell proliferation, 10 µM BrdU (Sigma) was added to the medium 3 h prior to  
404 organoid culture fixation.

405 For long term culture, organoids were cultured for 30 days with media changed every 3 days.  
406 Then Matrigel with organoids was disrupted with a 1 ml pipette and treated with trypsin-EDTA for 5  
407 min, passed through a 25-gauge needle to obtain single cells. 30,000 cells were seeded in 50 µl Matrigel  
408 and treated with BOM with appropriate growth factors. The cells were cultured for 16 days with media  
409 changed every 3 days.

410 For inhibitor assays, the organoid cultures were treated with inhibitors in concentrations as  
411 indicated ([Supplemental Table 1](#)). Fresh medium with 1 nM FGF2 and/or inhibitors was changed every  
412 3 days if not indicated otherwise.

### 413 **Organoid morphology analysis**

414 Organoid branching was evaluated in ImageJ from time-lapse videos and branching was defined as  
415 formation of a new bud/branch from the organoid. Branches wider than 150 µm were considered as  
416 “massive branches”. 20 organoids per condition per experiment were analyzed, organoids that fused  
417 with another organoid or collapsed after attachment to the bottom of the well were excluded from  
418 the quantification.

### 419 **Organoid histology, immunohistochemistry and immunofluorescence on histological sections**

420 Organoid cultures were washed 3 times with PBS and fixed for 30 min in 4% paraformaldehyde  
421 (Electron Microscopy Sciences). After washing with PBS, the cultures were embedded in 3% low gelling  
422 temperature agarose (Sigma). After solidification, the samples were dehydrated and embedded in  
423 paraffin. Sections (5 µm thick) were cut and dewaxed for hematoxylin and eosin staining or  
424 immunostaining.

425 For immunohistochemistry, antigens were retrieved in Citrate buffer, pH 6 or Tris-EDTA buffer,  
426 pH 9 (both Dako), endogenous peroxidase activity was blocked using 3% hydrogen peroxide and  
427 sections were blocked in PBS with 10% FBS (blocking buffer) for 1 h. Then, sections were incubated  
428 with primary antibody in blocking buffer for 2 h. After washing, sections were incubated with  
429 secondary antibody in blocking buffer for 30 min. Nuclei were counterstained with Mayer’s  
430 hematoxylin, sections were dehydrated and mounted in Pertex (Histolab Products). The samples were  
431 photographed using Leica DM5000 equipped with Leica DFC480 camera.

432 To perform immunofluorescence staining, antigens were retrieved in Citrate buffer, pH 6 or  
433 Tris-EDTA buffer, pH9 (both Dako), blocked in PBS with 10% FBS (blocking buffer) for 1 h and incubated  
434 with primary antibodies in blocking buffer overnight. After washing, sections were incubated with  
435 secondary antibodies in blocking buffer for 2 h. Nuclei were counterstained with DAPI for 10 min and  
436 slides were mount with Mowiol (Sigma). The samples were photographed using Leica DM5000  
437 equipped with Leica DFC480 camera or Zeiss Axioimager 2. Antibodies and their concentrations used  
438 in this study are listed in [Supplemental Table 2](#).

#### 439 **Whole-mount organoid staining**

440 For whole-mount imaging, organoids were 3D cultured in coverslip-bottom dishes (Ibidi). Organoid  
441 cultures were fixed with 4% paraformaldehyde for 30 min, permeabilized in 0.05% Triton X-100 in PBS  
442 for 1 h and blocked for 3 h with blocking buffer. Primary antibodies ([Supplemental Table 2](#)) diluted in  
443 blocking buffer were incubated with samples overnight at 4°C. After washing, samples were incubated  
444 with secondary antibodies ([Supplemental Table 2](#)) and 2 U/sample phalloidin-AlexaFluor488 (Thermo  
445 Fisher Scientific) in blocking solution for 2 h in darkness. Subsequently, samples were stained with 0.5  
446 µg/ml DAPI (Merck) for 10 min and stored in PBS in 4°C in darkness until analyzed. The organoids were  
447 imaged using an LSM800 confocal microscope (Zeiss) and analyzed and exported using ZEN blue  
448 software (Zeiss).

#### 449 **Mammary gland processing for histology**

450 For histological analysis, 4<sup>th</sup> mammary glands were removed from euthanized mice, spread on  
451 microscopy slide and fixed overnight in 4% paraformaldehyde. After washing in tap water, mammary  
452 glands were moved to histological cassettes and processed via standard procedure for paraffin  
453 embedding. Paraffin sections were cut (5 µm thick), dewaxed using xylene and rehydrated for  
454 hematoxylin and eosin staining or immunostaining.

#### 455 **Transmission electron microscopy**

456 The samples were fixed with 3% glutaraldehyde in 100 mM sodium cacodylate buffer, pH 7.4 for 45  
457 min, postfixed in 1% OsO<sub>4</sub> for 50 min, and washed with cacodylate buffer. After embedding in 1% agar  
458 blocks, the samples were dehydrated in increasing ethanol series (50, 70, 96, and 100%), treated with  
459 100% acetone, and embedded in Durcupan resin (Merck). Ultrathin sections were prepared using LKB  
460 8802A Ultramicrotome, stained with uranyl acetate and Reynold's lead citrate (Merck), and examined  
461 with FEI Morgagni 286(D) transmission electron microscope.

#### 462 **Mammosphere assay**

463 To test primary mammosphere formation efficiency, organoids which had been treated with BOM  
464 only, 1 nM FGF2-wt or 1 nM FGF2-STAB, were resuspended on day 4 of culture in 5 mM EDTA in PBS  
465 and shaken at 200 rpm on orbital shaker on ice for 1 h to dissolve the Matrigel. After washing with PBS,  
466 organoids were treated with HyQtase (Hyclone/GE Healthcare) for 10 min at 37°C and disintegrated  
467 by passing through a 24-gauge needle to acquire single cell suspension. Cells were then resuspended  
468 in mammosphere medium [1×B27 without vitamin A, 100 U/ml of penicillin, 100 µg/ml of streptomycin  
469 (all Thermo Fisher Scientific), 4 µg/ml heparin (Sigma), 20 ng/ml epidermal growth factor (Peprotech),  
470 10 ng/ml FGF2-wt (Enantis) in phenol red-free DMEM/F12 (Thermo Fisher Scientific)] and seeded in  
471 polyHEMA-coated 6-well plates in concentration 20,000 cells per well. Fresh medium was provided  
472 every 3 days. After 9 days of culture, mammospheres were counted and mammosphere formation  
473 efficiency was calculated as number of formed mammospheres divided by number of cells seeded ×  
474 100. To assess secondary and tertiary mammosphere formation efficiency, primary or secondary

475 mammospheres, respectively, were treated with HyQtase for 10 min at 37°C and disintegrated by  
476 passing through a 24-gauge needle to acquire single cell suspension. 20,000 cells per well were seeded  
477 in polyHEMA-coated 6-well plates in mammosphere medium and cultured and quantified similarly as  
478 primary mammospheres.

#### 479 **Western blot**

480 Organoid cultures were disintegrated by pipetting up and down in ice cold PBS with phosphatase  
481 inhibitors (10 mM  $\beta$ -glycerophosphate, 5 mM NaF, 1 mM  $\text{Na}_3\text{VO}_4$ ), spun down and lysed in RIPA buffer  
482 (150 mM NaCl, 1.0% NP-40, 0.5% sodium deoxycholate, 0.1% SDS, 50 mM Tris, pH 8.0) supplied with  
483 proteinase and phosphatase inhibitors (10 mM  $\beta$ -glycerophosphate, 5 mM NaF, 1 mM  $\text{Na}_3\text{VO}_4$ , 1 mM  
484 dithiothreitol, 0.5 mM phenylmethanesulphonylfluoride, 2  $\mu\text{g}/\text{ml}$  aprotinin, 10  $\mu\text{g}/\text{ml}$  leupeptin; all  
485 Merck). Protein lysates were homogenized by sonication, cleared by centrifugation and protein  
486 concentration was measured using the Bradford reagent. Denatured, reduced samples were resolved  
487 on 10% SDS-PAGE gels and blotted onto PVDF membranes (Merck). Membranes were blocked with 5%  
488 non-fat milk in PBS with 0.05% Tween-20 (Merck; blocking buffer) and incubated with primary  
489 antibodies ([Supplemental Table 2](#)) diluted in blocking buffer overnight at 4°C. After washing in PBS  
490 with 0.05% Tween-20, membranes were incubated with horseradish peroxidase-conjugated secondary  
491 antibodies (anti-mouse antibody and anti-rabbit antibody, Cell Signaling Technology) for 1 h at room  
492 temperature. Signal was developed using an ECL substrate (100 mM Tris-HCl, pH 8.5, 0.2 mM coumaric  
493 acid, 1.25 mM luminol, 0.01%  $\text{H}_2\text{O}_2$ ; all Merck) and exposed on X-ray films (Agfa), which were then  
494 scanned, and band density was analyzed using ImageJ. Phosphorylated and total proteins and actin  
495 were analyzed on a single blot.

#### 496 **qRT-PCR**

497 Organoid cultures were disintegrated by pipetting up and down in RLT buffer (Qiagen) and RNA was  
498 isolated using RNeasy Mini Kit (Qiagen) according to the manufacturer's instruction. RNA  
499 concentration was measured using NanoDrop 2000 (Thermo Fisher Scientific). RNA was transcribed  
500 into cDNA by using Transcriptor First Strand cDNA Synthesis Kit (Roche) or TaqMan Reverse  
501 Transcription kit (Life Technologies). Real-time qPCR was performed using 5 ng cDNA, 5 pmol of the  
502 forward and reverse gene-specific primers each ([Supplemental Table 3](#)) in Light Cycler SYBR Green I  
503 Master mix (Roche) on LightCycler 480 II (Roche). Relative gene expression was calculated using the  
504  $\Delta\Delta\text{Ct}$  method and normalization to two housekeeping genes,  $\beta$ -actin (*Actb*) and Eukaryotic elongation  
505 factor 1  $\gamma$  (*Eef1g*).

#### 506 **Mathematical modeling of FGF2 concentration dynamics**

507 Mathematical modeling of FGF2 concentration dynamics was based on half-lives of FGF2 variants: 6 h  
508 for FGF2-wt and c.a. 720 h for FGF2-STAB) (Dvorak et al., 2018). Function describing change in  
509 concentration ( $y$ ) dependent on time ( $x$ ) was determined as shown in (A1).

$$f(t) = c_0 \times \left(\frac{1}{2}\right)^{\frac{t}{t_{1/2}}}$$

510 (A1)

511 In (A1)  $c_0$  is initial concentration of FGF2,  $t$  is time in hours and  $t_{1/2}$  is half-life of FGF2. For conditions of  
512 1 nM FGF with media not changed, function of FGF2 concentration dynamics was determined for FGF2-  
513 wt and FGF2-STAB, respectively, as shown in (A2).

$$f_{FGF2-wt}(t) = \left(\frac{1}{2}\right)^{\frac{t}{6}} \quad f_{FGF2-STAB}(t) = \left(\frac{1}{2}\right)^{\frac{t}{720}} \quad (A2)$$

514

515 The area under the curve (AUC) was calculated as a sum of definite integrals with defined intervals as  
516 shown in (A3),

$$\sum_1^N \int_0^T c_0 \times \frac{1}{2^{\frac{t}{t_{1/2}}}} \times dt \quad (A3)$$

517

518 Where N is number of media changes (1 for NC; 3 for C3d; 9 for Ced; 36 for C6h); T is a time period  
519 determining the duration between two media changes (216 for NC; 72 for C3d; 24 for Ced; 6 for C6h);  
520  $c_0$  is initial concentration; t is time and  $t_{1/2}$  is half-life of FGF2.

521 For experiments where medium with FGF2 was washed out, FGF concentration after the washout was  
522 determined as zero. For experiment where FGF2 ligands were added every 6 h without changing the  
523 medium, the AUC was calculated as a sum of definite integrals of single 6 h intervals with the  $c_0$ =a  
524 determined for each interval separately as a function of a sequence given as shown in (A4) and (A5).

$$wt: a_1 = 1; a_{n+1} = 1 + \frac{1}{2}a_n \quad (A4)$$

525

$$STAB: a_1 = 1; a_{n+1} = 1 + \frac{1}{2} \times \frac{6}{720} a_n \quad (A5)$$

526

## 527 **Statistical analysis**

528 Statistical analysis was performed using Prism software (GraphPad) using unpaired Student's t-test or  
529 ANOVA. \*P < 0.05, \*\*P < 0.01, \*\*\*P < 0.001, \*\*\*\*P < 0.0001. Line plots and bar graphs were generated  
530 by Prism or Microsoft Excel and show mean ± standard deviation (s.d.).

## 531 **Acknowledgement**

532 This research was supported by the Grant Agency of Masaryk University (grant no. MUNI/G/1446/2018  
533 to Z.K and by funds from the Faculty of Medicine Masaryk University to junior researcher (Zuzana  
534 Koledova, ROZV/28/LF/2020). J.S. was funded by the P-Pool (Masaryk University, Faculty of Medicine)  
535 and by the Grant Agency of Masaryk University (grant no. MUNI/A/1565/2018). We thank Katarina  
536 Mareckova for excellent histology technical support, Dobromila Klemova for help with preparation of  
537 sections for electron microscopy, and Anas Rabata for help with mammosphere assay. We thank  
538 Veronika Stepankova, Radka Chaloupkova and Jiri Damborsky for providing the FGF2-wt and FGF2-  
539 STAB. We acknowledge the core facility CELLIM of CEITEC supported by the Czech-BioImaging large RI  
540 project (LM2018129 funded by MEYS CR) for their support with obtaining scientific data presented in  
541 this paper.

## 542 **Author Contributions**

543 J.S. designed and performed the experiments, analyzed the data and wrote the manuscript. Z.K.  
544 conceptualized the study, secured funding, designed and performed the experiments, analyzed the

545 data and wrote the manuscript. T.V. performed immunostainings and analyzed the data. All authors  
546 approved the final manuscript.

## 547 **Conflict of Interest**

548 The authors declare that they have no conflict of interest.

## 549 **Materials & Correspondence**

550 Correspondence and requests for materials should be addressed to Z.K.

## 551 **Data availability**

552 Data supporting the findings of this work are available within the paper and its Supplemental  
553 Information files. Other data are available from the corresponding author upon reasonable request.

## 554 **References**

- 555 Balasubramanian, R., and Zhang, X. (2016). Mechanisms of FGF gradient formation during  
556 embryogenesis. *Semin. Cell Dev. Biol.* *53*, 94–100.
- 557 Blum, Y., Mikelson, J., Dobrzyński, M., Ryu, H., Jacques, M.-A., Jeon, N.L., Khammash, M., and Pertz,  
558 O. (2019). Temporal perturbation of ERK dynamics reveals network architecture of FGF2/MAPK  
559 signaling. *Molecular Systems Biology* *15*, e8947.
- 560 Brownfield, D.G., Venugopalan, G., Lo, A., Mori, H., Tanner, K., Fletcher, D.A., and Bissell, M.J. (2013).  
561 Patterned collagen fibers orient branching mammary epithelium through distinct signaling modules.  
562 *Curr. Biol.* *23*, 703–709.
- 563 Chen, J.-Y., Lin, J.-R., Cimprich, K.A., and Meyer, T. (2012). A two-dimensional ERK-AKT signaling code  
564 for an NGF-triggered cell-fate decision. *Mol. Cell* *45*, 196–209.
- 565 de la Cova, C., Townley, R., Regot, S., and Greenwald, I. (2017). A Real-Time Biosensor for ERK Activity  
566 Reveals Signaling Dynamics during *C. elegans* Cell Fate Specification. *Dev. Cell* *42*, 542-553.e4.
- 567 Dvorak, P., Bednar, D., Vanacek, P., Balek, L., Eiselleova, L., Stepankova, V., Sebestova, E., Kunova  
568 Bosakova, M., Konecna, Z., Mazurenko, S., et al. (2018). Computer-assisted engineering of  
569 hyperstable fibroblast growth factor 2. *Biotechnol. Bioeng.* *115*, 850–862.
- 570 Ewald, A.J., Brenot, A., Duong, M., Chan, B.S., and Werb, Z. (2008). Collective epithelial migration and  
571 cell rearrangements drive mammary branching morphogenesis. *Dev. Cell* *14*, 570–581.
- 572 Fata, J.E., Mori, H., Ewald, A.J., Zhang, H., Yao, E., Werb, Z., and Bissell, M.J. (2007). The MAPK(ERK-  
573 1,2) pathway integrates distinct and antagonistic signals from TGF $\alpha$  and FGF7 in morphogenesis  
574 of mouse mammary epithelium. *Dev. Biol.* *306*, 193–207.
- 575 Geraldo, S., Simon, A., and Vignjevic, D.M. (2013). Revealing the cytoskeletal organization of invasive  
576 cancer cells in 3D. *J Vis Exp* e50763.
- 577 Gille, H., Kortenjann, M., Thomae, O., Moomaw, C., Slaughter, C., Cobb, M.H., and Shaw, P.E. (1995).  
578 ERK phosphorylation potentiates Elk-1-mediated ternary complex formation and transactivation.  
579 *EMBO J.* *14*, 951–962.

- 580 Gjorevski, N., and Nelson, C.M. (2011). Integrated morphodynamic signalling of the mammary gland.  
581 *Nat. Rev. Mol. Cell Biol.* *12*, 581–593.
- 582 Gotoh, Y., Nishida, E., Yamashita, T., Hoshi, M., Kawakami, M., and Sakai, H. (1990). Microtubule-  
583 associated-protein (MAP) kinase activated by nerve growth factor and epidermal growth factor in  
584 PC12 cells. Identity with the mitogen-activated MAP kinase of fibroblastic cells. *Eur. J. Biochem.* *193*,  
585 661–669.
- 586 Hinck, L., and Silberstein, G.B. (2005). Key stages in mammary gland development: The mammary  
587 end bud as a motile organ. *Breast Cancer Research* *7*, 245.
- 588 Huebner, R.J., Neumann, N.M., and Ewald, A.J. (2016). Mammary epithelial tubes elongate through  
589 MAPK-dependent coordination of cell migration. *Development* *143*, 983–993.
- 590 Koledova, Z. (2017). 3D Coculture of Mammary Organoids with Fibrospheres: A Model for Studying  
591 Epithelial-Stromal Interactions During Mammary Branching Morphogenesis. *Methods Mol. Biol.*  
592 *1612*, 107–124.
- 593 Koledova, Z., and Lu, P. (2017). A 3D Fibroblast-Epithelium Co-culture Model for Understanding  
594 Microenvironmental Role in Branching Morphogenesis of the Mammary Gland. *Methods Mol. Biol.*  
595 *1501*, 217–231.
- 596 Koledova, Z., Sumbal, J., Rabata, A., de La Bourdonnaye, G., Chaloupkova, R., Hrdlickova, B.,  
597 Damborsky, J., and Stepankova, V. (2019). Fibroblast Growth Factor 2 Protein Stability Provides  
598 Decreased Dependence on Heparin for Induction of FGFR Signaling and Alters ERK Signaling  
599 Dynamics. *Front Cell Dev Biol* *7*, 331.
- 600 Komatsu, N., Aoki, K., Yamada, M., Yukinaga, H., Fujita, Y., Kamioka, Y., and Matsuda, M. (2011).  
601 Development of an optimized backbone of FRET biosensors for kinases and GTPases. *Mol Biol Cell* *22*,  
602 4647–4656.
- 603 Li, P., and Elowitz, M.B. (2019). Communication codes in developmental signaling pathways.  
604 *Development* *146*.
- 605 Lilla, J.N., and Werb, Z. (2010). Mast cells contribute to the stromal microenvironment in mammary  
606 gland branching morphogenesis. *Developmental Biology* *337*, 124–133.
- 607 Lu, P., and Werb, Z. (2008). Patterning mechanisms of branched organs. *Science* *322*, 1506–1509.
- 608 Lu, P., Ewald, A.J., Martin, G.R., and Werb, Z. (2008). Genetic mosaic analysis reveals FGF receptor 2  
609 function in terminal end buds during mammary gland branching morphogenesis. *Dev Biol* *321*, 77–  
610 87.
- 611 Makarenkova, H.P., Hoffman, M.P., Beenken, A., Eliseenkova, A.V., Meech, R., Tsau, C., Patel, V.N.,  
612 Lang, R.A., and Mohammadi, M. (2009). Differential interactions of FGFs with heparan sulfate control  
613 gradient formation and branching morphogenesis. *Sci Signal* *2*, ra55.
- 614 Mori, H., Lo, A.T., Inman, J.L., Alcaraz, J., Ghajar, C.M., Mott, J.D., Nelson, C.M., Chen, C.S., Zhang, H.,  
615 Bascom, J.L., et al. (2013). Transmembrane/cytoplasmic, rather than catalytic, domains of Mmp14  
616 signal to MAPK activation and mammary branching morphogenesis via binding to integrin  $\beta$ 1.  
617 *Development* *140*, 343–352.

- 618 Murphy, L.O., Smith, S., Chen, R.-H., Fingar, D.C., and Blenis, J. (2002). Molecular interpretation of  
619 ERK signal duration by immediate early gene products. *Nat. Cell Biol.* *4*, 556–564.
- 620 Muta, Y., Matsuda, M., and Imajo, M. (2019). Divergent Dynamics and Functions of ERK MAP Kinase  
621 Signaling in Development, Homeostasis and Cancer: Lessons from Fluorescent Bioimaging. *Cancers*  
622 (Basel) *11*.
- 623 Muthuswamy, S.K., Li, D., Lelievre, S., Bissell, M.J., and Brugge, J.S. (2001). ErbB2, but not ErbB1,  
624 reinitiates proliferation and induces luminal repopulation in epithelial acini. *Nat. Cell Biol.* *3*, 785–  
625 792.
- 626 Nakakuki, T., Birtwistle, M.R., Saeki, Y., Yumoto, N., Ide, K., Nagashima, T., Bruschi, L., Ogunnaike,  
627 B.A., Okada-Hatakeyama, M., and Kholodenko, B.N. (2010). Ligand-specific c-Fos expression emerges  
628 from the spatiotemporal control of ErbB network dynamics. *Cell* *141*, 884–896.
- 629 Neumann, N.M., Perrone, M.C., Veldhuis, J.H., Huebner, R.J., Zhan, H., Devreotes, P.N., Brodland,  
630 G.W., and Ewald, A.J. (2018). Coordination of Receptor Tyrosine Kinase Signaling and Interfacial  
631 Tension Dynamics Drives Radial Intercalation and Tube Elongation. *Dev. Cell* *45*, 67-82.e6.
- 632 Nguyen, T.T., Scimeca, J.C., Filloux, C., Peraldi, P., Carpentier, J.L., and Van Obberghen, E. (1993). Co-  
633 regulation of the mitogen-activated protein kinase, extracellular signal-regulated kinase 1, and the  
634 90-kDa ribosomal S6 kinase in PC12 cells. Distinct effects of the neurotrophic factor, nerve growth  
635 factor, and the mitogenic factor, epidermal growth factor. *J. Biol. Chem.* *268*, 9803–9810.
- 636 Nguyen-Ngoc, K.-V., and Ewald, A.J. (2013). Mammary ductal elongation and myoepithelial migration  
637 are regulated by the composition of the extracellular matrix. *J Microsc* *251*, 212–223.
- 638 Niwa, Y., Masamizu, Y., Liu, T., Nakayama, R., Deng, C.-X., and Kageyama, R. (2007). The initiation and  
639 propagation of Hes7 oscillation are cooperatively regulated by Fgf and notch signaling in the somite  
640 segmentation clock. *Dev. Cell* *13*, 298–304.
- 641 Okuda, S., Miura, T., Inoue, Y., Adachi, T., and Eiraku, M. (2018). Combining Turing and 3D vertex  
642 models reproduces autonomous multicellular morphogenesis with undulation, tubulation, and  
643 branching. *Sci Rep* *8*, 2386.
- 644 Ornitz, D.M., and Itoh, N. (2015). The Fibroblast Growth Factor signaling pathway. *Wiley Interdiscip*  
645 *Rev Dev Biol* *4*, 215–266.
- 646 Paine, I.S., and Lewis, M.T. (2017). The Terminal End Bud: the Little Engine that Could. *J Mammary*  
647 *Gland Biol Neoplasia* *22*, 93–108.
- 648 Parsa, S., Ramasamy, S.K., De Langhe, S., Gupte, V.V., Haigh, J.J., Medina, D., and Bellusci, S. (2008).  
649 Terminal end bud maintenance in mammary gland is dependent upon FGFR2b signaling. *Dev. Biol.*  
650 *317*, 121–131.
- 651 Pond, A.C., Bin, X., Batts, T., Roarty, K., Hilsenbeck, S., and Rosen, J.M. (2013). Fibroblast growth  
652 factor receptor signaling is essential for normal mammary gland development and stem cell function.  
653 *Stem Cells* *31*, 178–189.
- 654 Ruan, W., and Kleinberg, D.L. (1999). Insulin-like growth factor I is essential for terminal end bud  
655 formation and ductal morphogenesis during mammary development. *Endocrinology* *140*, 5075–5081.



- 656 Ryu, H., Chung, M., Dobrzyński, M., Fey, D., Blum, Y., Lee, S.S., Peter, M., Kholodenko, B.N., Jeon,  
657 N.L., and Pertz, O. (2015). Frequency modulation of ERK activation dynamics rewires cell fate. *Mol.*  
658 *Syst. Biol.* *11*, 838.
- 659 Sampattavanich, S., Steiert, B., Kramer, B.A., Gyori, B.M., Albeck, J.G., and Sorger, P.K. (2018).  
660 Encoding Growth Factor Identity in the Temporal Dynamics of FOXO3 under the Combinatorial  
661 Control of ERK and AKT Kinases. *Cell Syst* *6*, 664-678.e9.
- 662 Santos, S.D.M., Verveer, P.J., and Bastiaens, P.I.H. (2007). Growth factor-induced MAPK network  
663 topology shapes Erk response determining PC-12 cell fate. *Nat. Cell Biol.* *9*, 324–330.
- 664 Simian, M., Hirai, Y., Navre, M., Werb, Z., Lochter, A., and Bissell, M.J. (2001). The interplay of matrix  
665 metalloproteinases, morphogens and growth factors is necessary for branching of mammary  
666 epithelial cells. *Development* *128*, 3117–3131.
- 667 Soady, K.J., Tornillo, G., Kendrick, H., Meniel, V., Olijnyk-Dallis, D., Morris, J.S., Stein, T., Gusterson,  
668 B.A., Isacke, C.M., and Smalley, M.J. (2017). The receptor protein tyrosine phosphatase PTPRB  
669 negatively regulates FGF2-dependent branching morphogenesis. *Development* *144*, 3777–3788.
- 670 Sumbal, J., and Koledova, Z. (2019). FGF signaling in mammary gland fibroblasts regulates multiple  
671 fibroblast functions and mammary epithelial morphogenesis. *Development* *146*.
- 672 Turner, N., and Grose, R. (2010). Fibroblast growth factor signalling: from development to cancer.  
673 *Nat. Rev. Cancer* *10*, 116–129.
- 674 Wahl, M.B., Deng, C., Lewandoski, M., and Pourquié, O. (2007). FGF signaling acts upstream of the  
675 NOTCH and WNT signaling pathways to control segmentation clock oscillations in mouse  
676 somitogenesis. *Development* *134*, 4033–4041.
- 677 Welm, B.E., Freeman, K.W., Chen, M., Contreras, A., Spencer, D.M., and Rosen, J.M. (2002). Inducible  
678 dimerization of FGFR1 development of a mouse model to analyze progressive transformation of the  
679 mammary gland. *J Cell Biol* *157*, 703–714.
- 680 Zhang, X., Martinez, D., Koledova, Z., Qiao, G., Streuli, C.H., and Lu, P. (2014). FGF ligands of the  
681 postnatal mammary stroma regulate distinct aspects of epithelial morphogenesis. *Development* *141*,  
682 3352–3362.
- 683

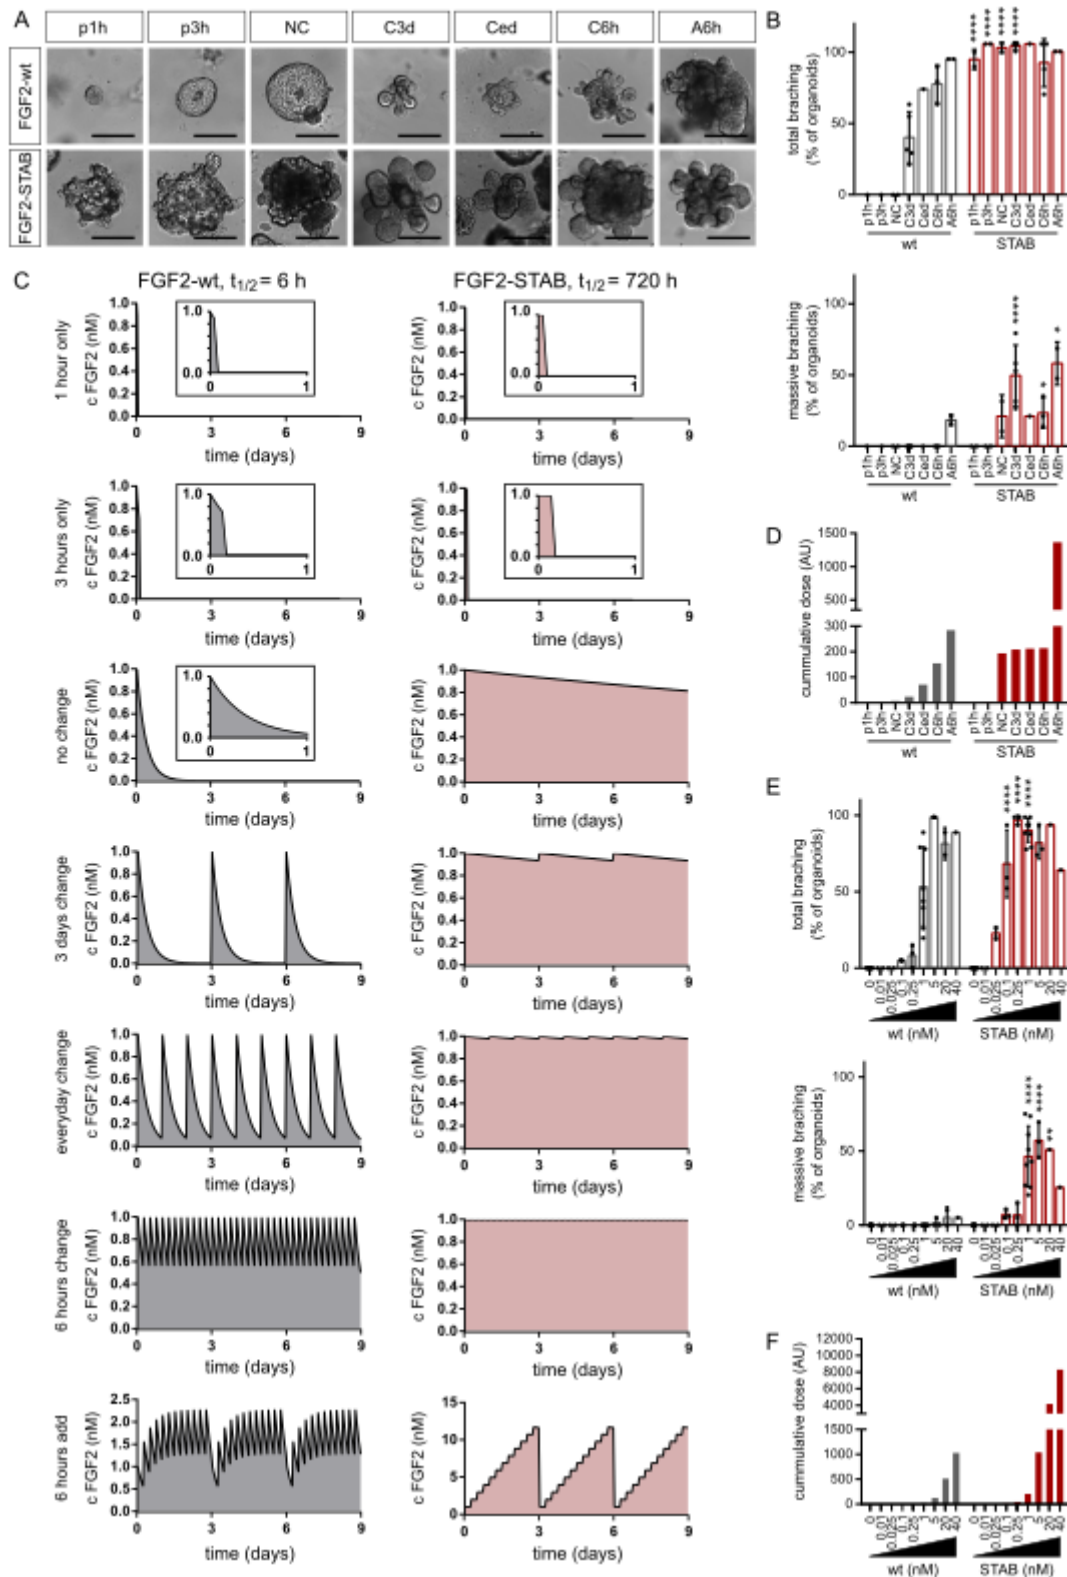

684

685 **Figure 1. FGF signaling dynamics governs epithelial morphogenesis.**

686 **A.** Organoids after 9 days of culture with different FGF signaling dynamics as depicted in **C**. Scale bars,  
 687 200  $\mu$ m. P1h, 1-hour pulse; p3h, 3-hour pulse; NC, medium was not changed during the whole 9-day  
 688 culture of organoids; C3d, medium was changed every 3 days; Ced, medium was changed every day;  
 689 C6h, medium was changed every 6 h; A6h, fresh FGF2 was added to the medium every 6 h and every  
 690 3 days, the full medium volume was changed.

- 691 **B.** Total (normal + massive) branching and massive branching of organoids subjected to different  
692 medium changing strategies. The plots show mean + s.d., N = 20-100 organoids, n = 1-5 independent  
693 experiments; for exact numbers see [Supplemental Table 4](#). The asterisks indicate significant difference  
694 between FGF2-wt and FGF2-STAB per condition; \*P < 0.05; \*\*\*\*P < 0.0001 (two-way ANOVA).
- 695 **C.** The graphs show mathematic models of FGF2 concentration dynamics in culture during different  
696 medium changing strategies. The models are based on the FGF2 half-lives (6 h for FGF2-wt and 720 h  
697 for FGF2-STAB). Potential active FGF2 degradation or production by the cells was not accounted for.  
698 FGF2-wt is depicted in grey, FGF2-STAB in pink. Insets show detail of FGF dynamic during the first day  
699 of culture.
- 700 **D.** The plot shows cumulative FGF2 dose, calculated from the mathematic model of FGF2  
701 concentration dynamics as the area under the curves shown in **C**.
- 702 **E.** Analysis of organoid morphogenetic response to a range of FGF2 concentrations. The plots show  
703 quantification of total (normal + massive) branching and massive branching of organoids, respectively,  
704 in response to a range of FGF2 concentrations. The plots show mean + s.d., N = 20-180 organoids, n =  
705 1-9 independent experiments; for exact numbers see [Supplemental Table 4](#). The asterisks indicate  
706 significant difference between FGF2-wt and FGF2-STAB per condition; \*\*P < 0.01; \*\*\*\*P < 0.0001 (two-  
707 way ANOVA).
- 708 **F.** The plot shows cumulative FGF2 dose, calculated from the mathematic model of FGF2 concentration  
709 dynamics as the area under the curve.

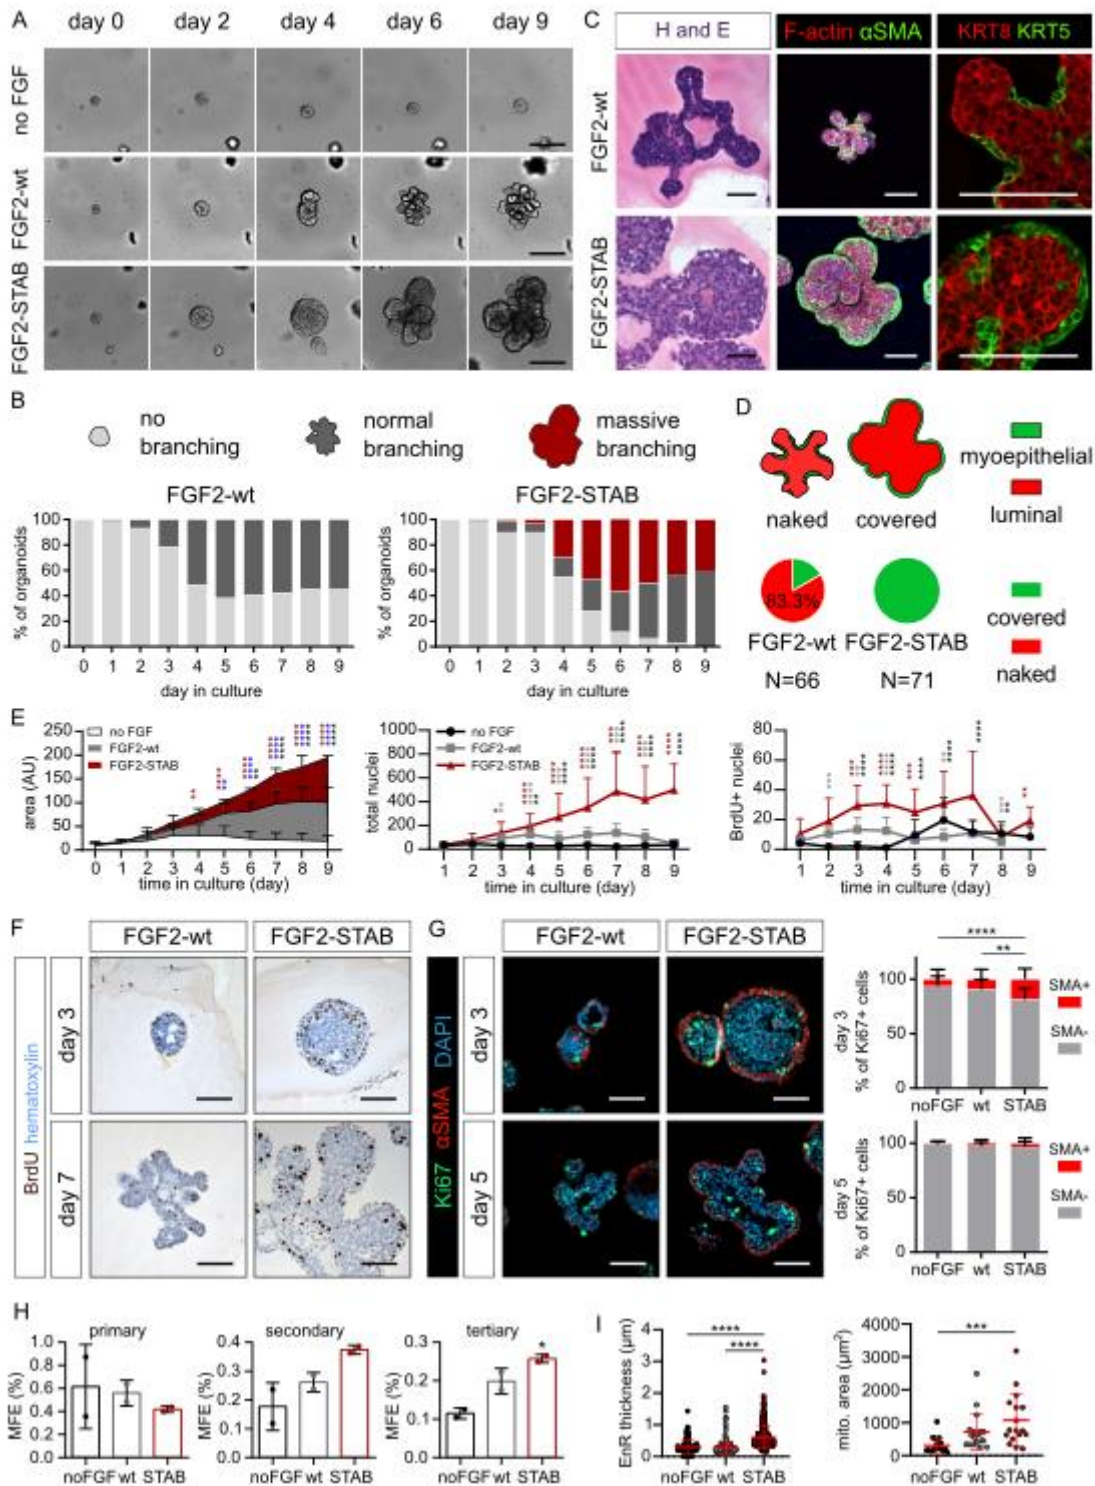

710

711 **Figure 2. Sustained FGF signaling regulates multiple epithelial cell functions.**

712 **A.** Morphogenesis of organoids with no FGF, 1 nM FGF2-wt, or 1 nM FGF2-STAB. Snapshots are from  
713 a time-lapse experiment (see also [Supplemental Videos 1-3](#)). Scale bars, 200 μm.

714 **B.** Temporal analysis of organoid morphogenetic phenotypes. Light gray, no branching; dark gray  
715 normal branching; dark red, massive branching. A sum of three independent experiments with 20  
716 organoids tracked per condition per experiment.

717 **C.** Whole-mount, histology and immunofluorescence of FGF2-wt- or FGF2-STAB-treated organoids.  
718  $\alpha$ SMA,  $\alpha$  smooth muscle actin; H and E, hematoxylin and eosin; KRT5, keratin 5; KRT8, keratin 8. Scale  
719 bars, 100  $\mu$ m.

720 **D.** Quantification of branch coverage with  $\alpha$ SMA+ cells.

721 **E.** Quantification of organoid growth from time-lapse experiments and from total number of nuclei or  
722 BrdU+ nuclei (shown in **B** and [Supplemental Figure 5A](#)). The plot shows mean + s.d., n = 3, N = 60  
723 organoids (time-lapse) and N = 3-40 organoids (histology) per condition; for exact numbers see  
724 [Supplemental Table 5](#). Red asterisks indicate the difference between FGF2-STAB and no FGF, blue  
725 asterisks between FGF2-wt and no FGF, black asterisks between FGF2-wt and FGF2-STAB. \*P < 0.05;  
726 \*\*P < 0.01; \*\*\*P < 0.001; \*\*\*\*P < 0.0001 (two-way ANOVA for time-lapse experiment; multiple t-tests  
727 with Holm-Sidak's test for histology).

728 **F.** BrdU staining of organoids treated with FGF2-wt or FGF2-STAB for 3 or 7 days. Scale bars, 50  $\mu$ m.

729 **G.** Ki67 and  $\alpha$ SMA staining of organoids treated with FGF2-wt or FGF2-STAB for 3 or 5 days and  
730 quantification of  $\alpha$ SMA- /  $\alpha$ SMA+ cell proportion among Ki67+ cells. Scale bars, 50  $\mu$ m. The plots show  
731 mean + s.d., N = 11-50 organoids per condition (see [Supplemental Table 5](#)). \*\* P < 0.01, \*\*\*\*P < 0.0001  
732 (two-way ANOVA).

733 **H.** Endoplasmic reticulum (EnR) thickness and mitochondrial area of organoids. The plots show mean  
734  $\pm$  s.d. N = 116, 234, and 436 of ER cisternae, and 17, 19, and 17 mitochondria from organoids treated  
735 with no FGF, FGF2-wt, or FGF2-STAB for 5 days, respectively. \*\*\*P < 0.001; \*\*\*\*P < 0.0001 (one-way  
736 ANOVA).

737 **I.** Primary, secondary and tertiary mammosphere formation efficiency (MFE) of cells from organoids  
738 cultured with no FGF, FGF2-wt, or FGF2-STAB for 5 days. The plots show mean + s.d., n = 2 independent  
739 experiments. \*P < 0.05 (one-way ANOVA).

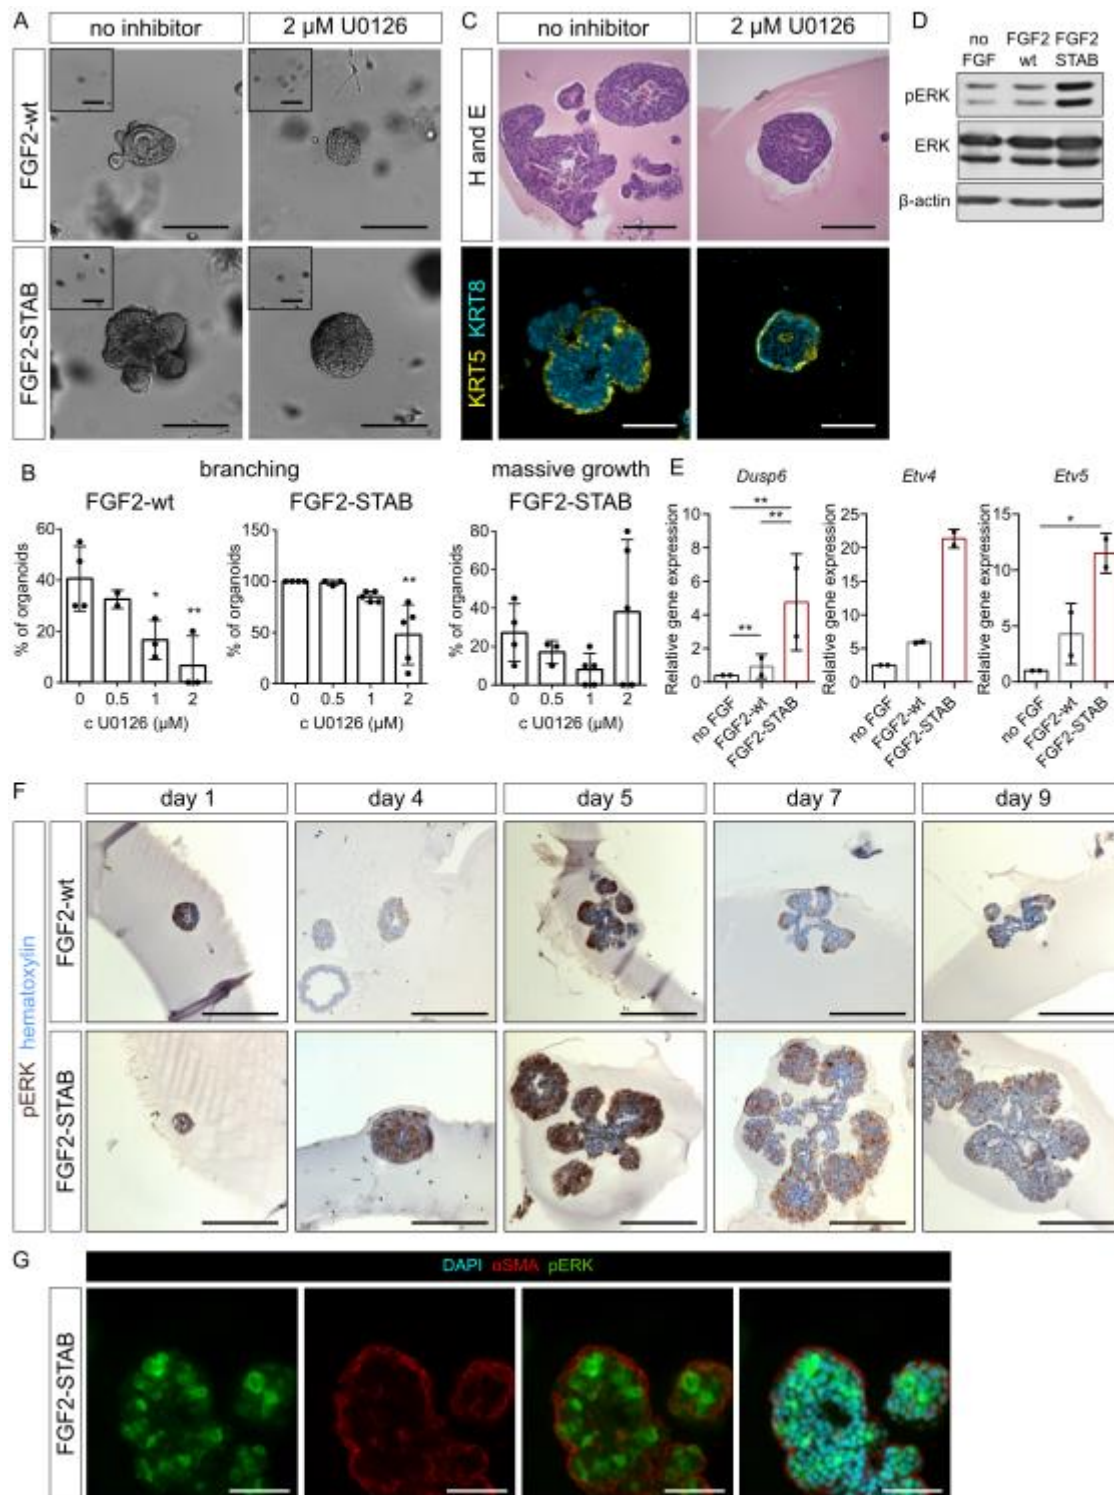

740

741 **Figure 3. FGF2 signaling dynamics regulates epithelial branching via ERK signaling.**

742 **A.** Organoids cultured with FGF2-wt or FGF2-STAB and with or without ERK inhibitor U0126 for 9 days.  
743 Insets show organoids on day 0. Scale bars, 200  $\mu$ m.

744 **B.** Quantification of organoid morphogenetic response – total branching or massive growth – to ERK  
745 inhibitor at a range of concentrations. The plots show mean + s.d., n = 2-4 independent experiments,  
746 N = 20 organoids per experiment; for exact numbers see [Supplemental Table 4](#). \*P < 0.05; \*\*P < 0.01;  
747 \*\*\*P < 0.001 (one-way ANOVA).

- 748 **C.** Histological and immunofluorescence analysis of FGF2-STAB-treated organoid architecture upon  
749 ERK inhibitor treatment. H and E, hematoxylin and eosin; KRT5, keratin 5; KRT8, keratin 8. Scale bars,  
750 100  $\mu\text{m}$ .
- 751 **D.** Phosphorylated ERK (pERK) distribution in sections of organoids treated with 1 nM FGF2-wt or FGF2-  
752 STAB. Scale bars, 200  $\mu\text{m}$ .
- 753 **E.** Western blot analysis of pERK, total ERK, and  $\beta$ -actin amount in organoids on day 5 in culture, 48 h  
754 after FGF2 treatment.
- 755 **F.** qPCR analysis of *Dusp6*, *Etv4* and *Etv5* gene expression in organoids on day 5 in culture, 48 h after  
756 FGF2 treatment. The plots show mean + s.d., n = 2. \*P < 0.05; \*\*P < 0.01 (one-way ANOVA).
- 757 **G.** Distribution of pERK in basal ( $\alpha\text{SMA}^+$ ) and luminal ( $\alpha\text{SMA}^-$ ) cells in a section of organoid treated  
758 with FGF2-STAB for 5 days. Scale bars, 50  $\mu\text{m}$ .

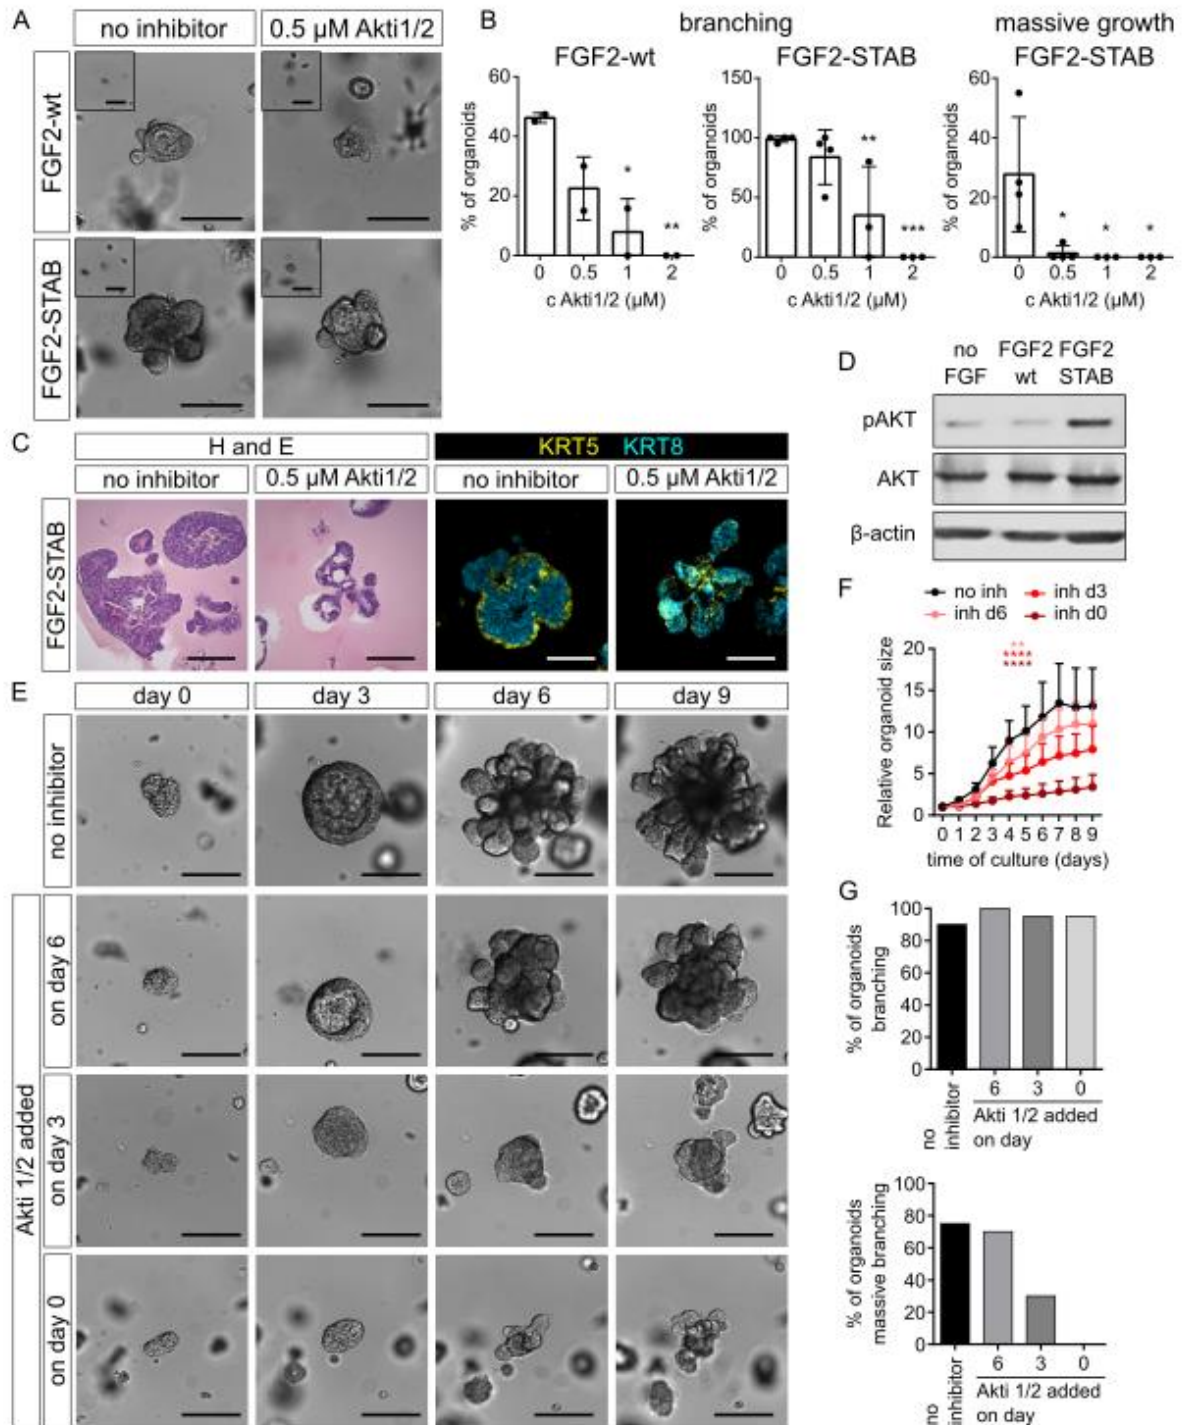

759

760 **Figure 4. AKT signaling is crucial for sustained FGF2 signaling-induced epithelial stratification.**

761 **A.** Organoids cultured with FGF2-wt or FGF2-STAB and with or without AKT inhibitor (Akti) for 9 days  
 762 of culture. The images of organoids without inhibitor are the same as in [Figure 3A](#) because they are  
 763 from the same experiment. Insets show organoids on day 0. Scale bars, 200  $\mu$ m.

764 **B.** Quantification of organoid morphogenetic response – total branching or massive growth – to  
 765 Akti1/2 at a range of concentrations. The plots show mean + s.d., n = 2-5 independent experiments,  
 766 N = 20 organoids per experiment; for exact numbers see [Supplemental Table 4](#). \*P < 0.05; \*\*P < 0.01;  
 767 \*\*\*P < 0.001 (one-way ANOVA).



- 768 **C.** Histological and immunofluorescence analysis of FGF2-STAB-treated organoid architecture upon  
769 Akti treatment. H and E, hematoxylin and eosin; KRT5, keratin 5; KRT8, keratin 8. Scale bars, 100  $\mu$ m.
- 770 **D.** Western blot analysis of phosphorylated AKT (pAKT), total AKT and  $\beta$ -actin level in organoids on day  
771 5 of culture, 48 h after treatment with FGF2.
- 772 **E.** Organoid morphogenesis in response to FGF2-STAB and no inhibitor or AKT inhibitor (0.5  $\mu$ M  
773 Akti1/2) added on day 0, 3 or 6 of culture. The images are snapshots from time-lapse imaging of the  
774 organoids. Scale bars, 200  $\mu$ m.
- 775 **F.** FGF2-STAB-treated organoid size upon no inhibitor or treatment with Akti1/2 on day 0, 3, or 6. The  
776 plot shows mean + s.d., n = 1 experiment, N = 20 organoids per condition. \*\*P < 0.01; \*\*\*\*P < 0.0001  
777 (one-way ANOVA). Pink asterisks: control (no inhibitor) to inhibitor on day 6; red asterisks control to  
778 inhibitor on day 3; dark red asterisks control to inhibitor on day 0).
- 779 **G.** Quantification of organoid total branching and massive growth in cultures from **D**. N = 20 organoids  
780 per condition.

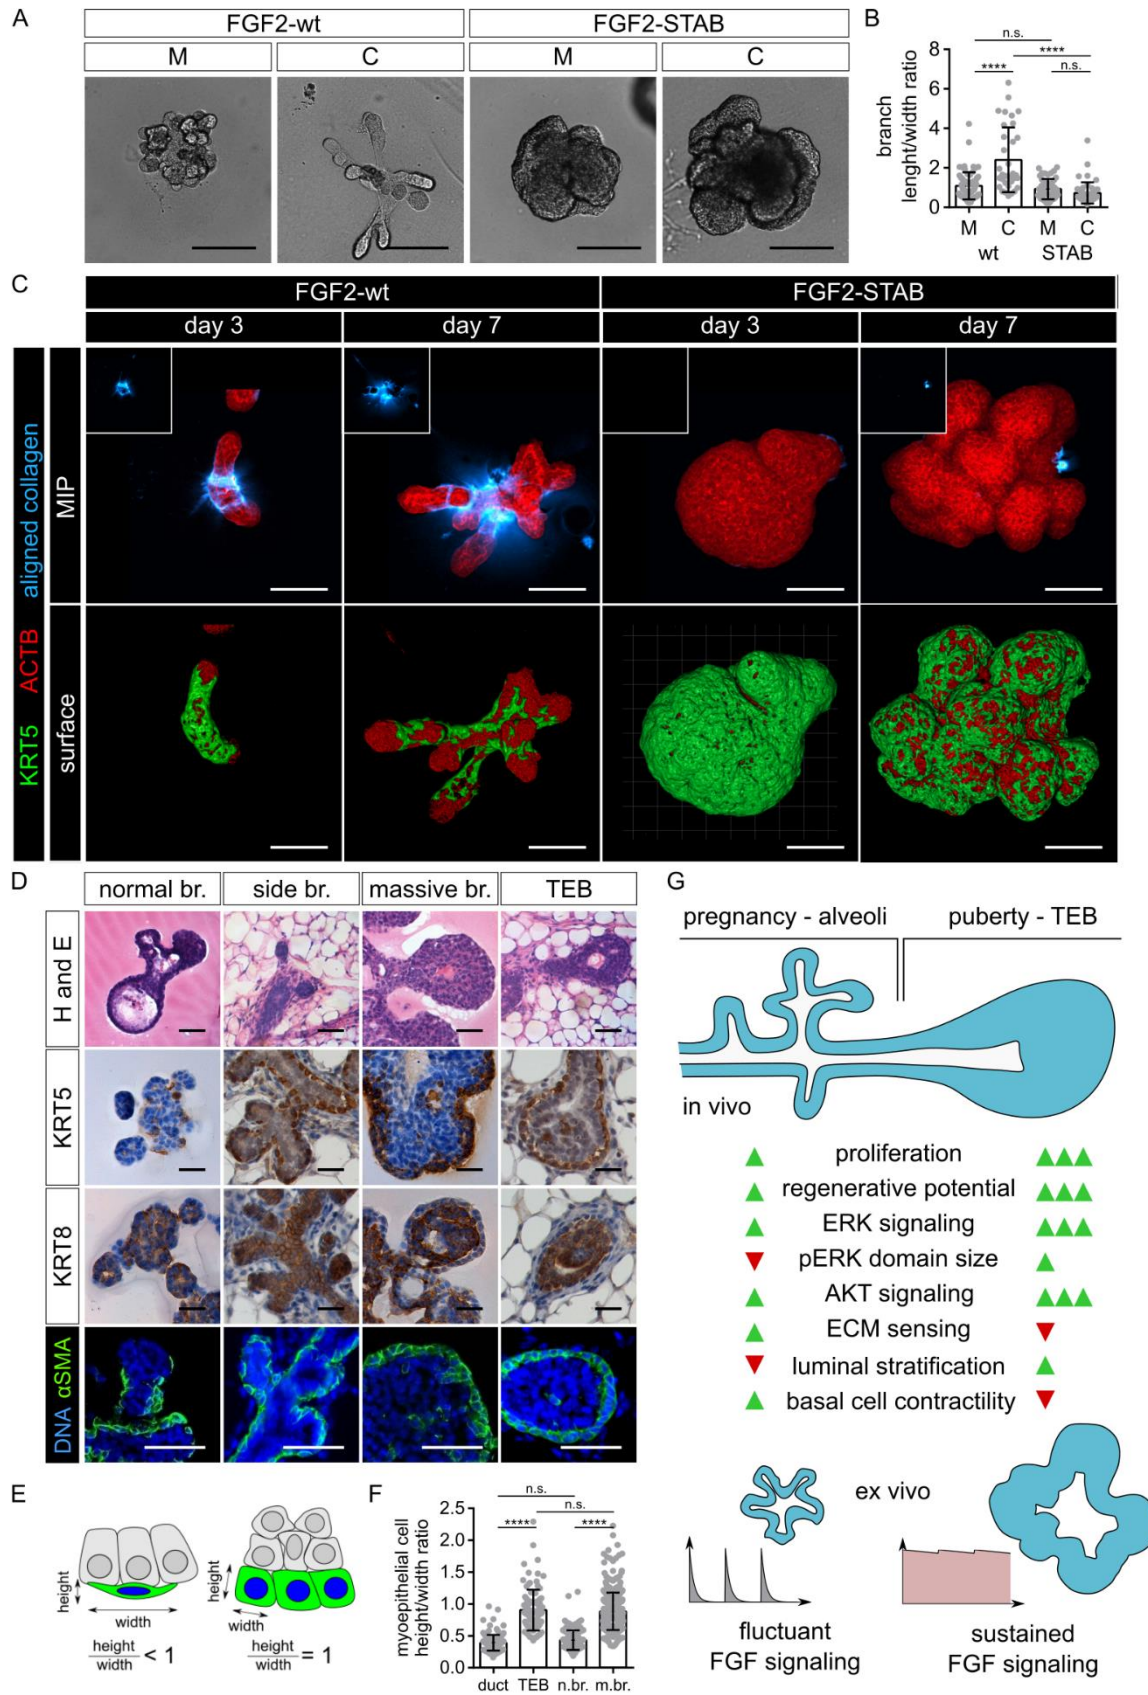

781

782

**Figure 5. Massive branches phenocopy TEBs.**

783 **A.** Organoid morphogenesis in response to FGF2-wt and FGF2-STAB in Matrigel (M) or a mixture of  
 784 Matrigel with collagen (C). Scale bars, 100  $\mu$ m. Representative results of 3 independent biological  
 785 replicates.

786 **B.** Quantification of branch elongation in a mixture of Matrigel with collagen as branch length to width  
787 ratio. The plot shows mean + s.d., N = 71 (wt, M), 34 (wt, C), 48 (STAB, M) and 50 (STAB, C) branches.  
788 **C.** Maximum intensity projection (MIP) and surface reconstruction images of organoids cultured in a  
789 mixture of Matrigel with collagen (fluorescently labelled) and imaged using a confocal microscope.  
790 Scale bars, 100  $\mu$ m.

791 **D.** Hematoxylin and eosin (H and E; top row), immunohistochemical (second and third row), and  
792 immunofluorescence (bottom row) staining on sections of organoids with normal or massive branches,  
793 and of side branches and TEB in mammary gland tissue. Scale bars, 100  $\mu$ m.

794 **E.** Scheme depicting morphology of myoepithelial cells (green) with height/width ratio lower or equal  
795 to 1. Luminal cells are shown as grey.

796 **F.** Quantification of myoepithelial cell height to width ratio of mammary gland side branches and TEBs,  
797 and normal branches of FGF2-wt-treated organoid and massive branches of FGF2-STAB-treated  
798 organoids. The plot shows mean + s.d., N = 155 (duct), 98 (TEB), 128 (normal br.) and 423 (massive br.)  
799 myoepithelial cells. \*\*\*\*P < 0.0001; (one-way ANOVA).

800 **G.** Schematics of cell behaviors and underlying signaling activities in the mammary gland and in ex vivo  
801 mammary organoid cultures upon different FGF signaling dynamics. MG, mammary gland; TEB,  
802 terminal end bud.
